# Supplementary material for: Incidence of Bacteriocins Produced by Food-Related Lactic Acid Bacteria Active towards Oral Pathogens
Source: Int J Mol Sci. 2013 Feb 26;14(3):4640–54. doi: 10.3390/ijms14034640 (PMC3634443; doi:10.3390/ijms14034640)
Supplement: Supplementary file 1 [file ijms-14-04640-s001.pdf]

## Supporting Information

**Table S1.** Strains within the set of 236 strains of the lactic acid bacteria screened in this study known to produce bacteriocins against food-related indicator strains.

| No.     | Producer strain                                                      | Source          | Indicator strains                             |                                                                           |                                               |                                              |                                        |                                    |                                            |                                      |                                        |                                       |                                            |   |
|---------|----------------------------------------------------------------------|-----------------|-----------------------------------------------|---------------------------------------------------------------------------|-----------------------------------------------|----------------------------------------------|----------------------------------------|------------------------------------|--------------------------------------------|--------------------------------------|----------------------------------------|---------------------------------------|--------------------------------------------|---|
|         |                                                                      |                 | Bacilli                                       |                                                                           |                                               |                                              |                                        |                                    | Cocci                                      |                                      |                                        |                                       |                                            |   |
|         |                                                                      |                 | <i>Clostridium tyrobutyricum</i><br>NCDO 1754 | <i>Lactobacillus delbrueckii</i><br>subsp. <i>bulgaricus</i><br>ACA-DC 84 | <i>Lactobacillus helveticus</i><br>ATCC 15009 | <i>Lactobacillus plantarum</i><br>ACA-DC 125 | <i>Lactobacillus sakei</i><br>LMG 2313 | <i>Listeria innocua</i><br>BL86/26 | <i>Enterococcus faecalis</i><br>ACA-DC 138 | <i>Enterococcus faecalis</i><br>EF-1 | <i>Lactococcus lactis</i><br>ACA-DC 49 | <i>Lactococcus lactis</i><br>CNRZ 117 | <i>Streptococcus thermophilus</i> ACA-DC 4 |   |
| Bacilli |                                                                      |                 |                                               |                                                                           |                                               |                                              |                                        |                                    |                                            |                                      |                                        |                                       |                                            |   |
| 1       | <i>Lactobacillus acidophilus</i> ACA-DC 4002                         | Sourdough       |                                               |                                                                           |                                               |                                              |                                        | ✓                                  |                                            |                                      | ✓                                      | ✓                                     |                                            |   |
| 2       | <i>Lactobacillus fermentum</i> ACA-DC 179                            | Kasseri cheese  |                                               |                                                                           |                                               |                                              |                                        |                                    |                                            |                                      |                                        |                                       |                                            | ✓ |
| 3       | <i>Lactobacillus delbrueckii</i> subsp. <i>bulgaricus</i> ACA-DC 321 | Staka chesse    |                                               |                                                                           |                                               |                                              |                                        |                                    |                                            | ✓                                    | ✓                                      |                                       |                                            |   |
| 4       | <i>Lactobacillus paracasei</i> ACA-DC 116                            | Feta brine      |                                               |                                                                           |                                               |                                              |                                        | ✓                                  |                                            |                                      | ✓                                      | ✓                                     |                                            |   |
| 5       | <i>Lactobacillus paracasei</i> ACA-DC 3353                           | Kasseri cheese  | ✓                                             |                                                                           |                                               | ✓                                            |                                        |                                    |                                            |                                      |                                        |                                       |                                            |   |
| 6       | <i>Lactobacillus plantarum</i> ACA-DC 146                            | Feta brine      |                                               | ✓                                                                         |                                               |                                              |                                        | ✓                                  |                                            |                                      | ✓                                      |                                       |                                            |   |
| 7       | <i>Lactobacillus plantarum</i> ACA-DC 147                            | Feta brine      |                                               |                                                                           |                                               |                                              |                                        | ✓                                  |                                            |                                      | ✓                                      | ✓                                     |                                            |   |
| 8       | <i>Lactobacillus plantarum</i> ACA-DC 201                            | Kasseri cheese  |                                               |                                                                           |                                               | ✓                                            | ✓                                      |                                    |                                            |                                      |                                        |                                       |                                            |   |
| 9       | <i>Lactobacillus plantarum</i> ACA-DC 279                            | Xynotyri cheese |                                               |                                                                           |                                               |                                              |                                        | ✓                                  |                                            |                                      | ✓                                      | ✓                                     | ✓                                          |   |
| 10      | <i>Lactobacillus plantarum</i> ACA-DC 280                            | Xynotyri cheese |                                               | ✓                                                                         |                                               |                                              |                                        | ✓                                  |                                            |                                      | ✓                                      |                                       |                                            |   |
| 11      | <i>Lactobacillus plantarum</i> ACA-DC 281                            | Xynotyri cheese |                                               |                                                                           |                                               |                                              |                                        | ✓                                  |                                            |                                      |                                        | ✓                                     | ✓                                          |   |
| 12      | <i>Lactobacillus plantarum</i> ACA-DC 288                            | Xynotyri cheese |                                               |                                                                           |                                               | ✓                                            | ✓                                      |                                    |                                            |                                      | ✓                                      |                                       |                                            |   |
| 13      | <i>Lactobacillus plantarum</i> ACA-DC 424                            | Arseniko cheese |                                               |                                                                           | ✓                                             |                                              | ✓                                      |                                    |                                            |                                      |                                        |                                       |                                            |   |
| 14      | <i>Lactobacillus plantarum</i> ACA-DC 490                            | Arseniko cheese |                                               |                                                                           |                                               |                                              |                                        | ✓                                  |                                            |                                      |                                        | ✓                                     |                                            |   |
| 15      | <i>Lactobacillus plantarum</i> ACA-DC 2293                           | Feta cheese     |                                               | ✓                                                                         |                                               | ✓                                            | ✓                                      |                                    |                                            |                                      | ✓                                      |                                       |                                            |   |
| 16      | <i>Lactobacillus plantarum</i> ACA-DC 2350                           | Feta cheese     |                                               |                                                                           |                                               |                                              | ✓                                      | ✓                                  |                                            |                                      |                                        |                                       |                                            | ✓ |
| 17      | <i>Lactobacillus plantarum</i> ACA-DC 2414                           | Feta cheese     |                                               |                                                                           |                                               |                                              | ✓                                      | ✓                                  |                                            |                                      | ✓                                      |                                       |                                            |   |
| 18      | <i>Lactobacillus plantarum</i> ACA-DC 2580                           | Feta cheese     |                                               | ✓                                                                         |                                               | ✓                                            |                                        |                                    |                                            |                                      |                                        |                                       |                                            |   |
| 19      | <i>Lactobacillus plantarum</i> ACA-DC 2640                           | Feta cheese     |                                               |                                                                           |                                               |                                              | ✓                                      | ✓                                  |                                            |                                      | ✓                                      |                                       |                                            |   |
| 20      | <i>Lactobacillus plantarum</i> ACA-DC 2652                           | Feta cheese     |                                               |                                                                           |                                               | ✓                                            | ✓                                      | ✓                                  |                                            |                                      |                                        |                                       |                                            |   |
| 21      | <i>Lactobacillus plantarum</i> ACA-DC 2830                           | Feta cheese     |                                               |                                                                           |                                               |                                              |                                        | ✓                                  |                                            |                                      | ✓                                      | ✓                                     |                                            |   |
| 22      | <i>Lactobacillus plantarum</i> ACA-DC 2881                           | Feta cheese     |                                               |                                                                           | ✓                                             |                                              | ✓                                      | ✓                                  |                                            |                                      |                                        |                                       |                                            |   |

Table S1. Cont.

| No.   | Producer strain                                                       | Source                   | Indicator strains                             |                                                                           |                                               |                                              |                                        |                                    |                                            |                                      |                                        |                                       |                                            |   |
|-------|-----------------------------------------------------------------------|--------------------------|-----------------------------------------------|---------------------------------------------------------------------------|-----------------------------------------------|----------------------------------------------|----------------------------------------|------------------------------------|--------------------------------------------|--------------------------------------|----------------------------------------|---------------------------------------|--------------------------------------------|---|
|       |                                                                       |                          | Bacilli                                       |                                                                           |                                               |                                              |                                        |                                    |                                            |                                      | Cocci                                  |                                       |                                            |   |
|       |                                                                       |                          | <i>Clostridium tyrobutyricum</i><br>NCDO 1754 | <i>Lactobacillus delbrueckii</i><br>subsp. <i>bulgaricus</i><br>ACA-DC 84 | <i>Lactobacillus helveticus</i><br>ATCC 15009 | <i>Lactobacillus plantarum</i><br>ACA-DC 125 | <i>Lactobacillus sakei</i><br>LMG 2313 | <i>Listeria innocua</i><br>BL86/26 | <i>Enterococcus faecalis</i><br>ACA-DC 138 | <i>Enterococcus faecalis</i><br>EF-1 | <i>Lactococcus lactis</i><br>ACA-DC 49 | <i>Lactococcus lactis</i><br>CNRZ 117 | <i>Streptococcus thermophilus</i> ACA-DC 4 |   |
| Cocci |                                                                       |                          |                                               |                                                                           |                                               |                                              |                                        |                                    |                                            |                                      |                                        |                                       |                                            |   |
| 23    | <i>Enterococcus faecalis</i> ACA-DC 3307                              | Raw milk cheese          | ✓                                             |                                                                           |                                               |                                              |                                        |                                    |                                            |                                      |                                        |                                       | ✓                                          |   |
| 24    | <i>Enterococcus faecium</i> ACA-DC 434                                | Arseniko cheese          |                                               |                                                                           |                                               | ✓                                            | ✓                                      |                                    |                                            |                                      |                                        |                                       |                                            |   |
| 25    | <i>Lactococcus lactis</i> ACA-DC 58                                   | Feta cheese              |                                               |                                                                           |                                               |                                              |                                        |                                    |                                            |                                      | ✓                                      |                                       |                                            | ✓ |
| 26    | <i>Lactococcus lactis</i> ACA-DC 59                                   | Feta curd                |                                               |                                                                           |                                               |                                              |                                        |                                    |                                            | ✓                                    | ✓                                      |                                       |                                            |   |
| 27    | <i>Lactococcus lactis</i> ACA-DC 60                                   | Kefalotyri cheese        |                                               |                                                                           |                                               |                                              |                                        |                                    |                                            | ✓                                    | ✓                                      |                                       | ✓                                          |   |
| 28    | <i>Lactococcus lactis</i> ACA-DC 154                                  | Kasseri cheese           |                                               | ✓                                                                         |                                               |                                              |                                        |                                    |                                            | ✓                                    | ✓                                      |                                       |                                            |   |
| 29    | <i>Lactococcus lactis</i> ACA-DC 4019                                 | Feta cheese              | ✓                                             |                                                                           |                                               |                                              |                                        |                                    |                                            |                                      |                                        | ✓                                     | ✓                                          | ✓ |
| 30    | <i>Lactococcus lactis</i> ACA-DC 4030                                 | Feta cheese              | ✓                                             | ✓                                                                         |                                               |                                              |                                        |                                    |                                            |                                      |                                        |                                       |                                            |   |
| 31    | <i>Lactococcus lactis</i> ACA-DC 4033                                 | Feta cheese              |                                               |                                                                           |                                               |                                              |                                        |                                    |                                            |                                      |                                        | ✓                                     | ✓                                          |   |
| 32    | <i>Lactococcus lactis</i> ACA-DC 4034                                 | Kasseri cheese           | ✓                                             |                                                                           |                                               |                                              |                                        |                                    |                                            | ✓                                    |                                        | ✓                                     |                                            |   |
| 33    | <i>Leuconostoc mesenteroides</i> subsp. <i>dextranicum</i> ACA-DC 493 | Arseniko cheese          |                                               |                                                                           |                                               |                                              | ✓                                      |                                    |                                            |                                      |                                        | ✓                                     | ✓                                          |   |
| 34    | <i>Pediococcus pentosaceus</i> ACA-DC 137                             | Feta brine               |                                               |                                                                           |                                               |                                              | ✓                                      | ✓                                  |                                            |                                      |                                        |                                       |                                            |   |
| 35    | <i>Streptococcus macedonicus</i> ACA-DC 198                           | Kasseri cheese           | ✓                                             | ✓                                                                         | ✓                                             | ✓                                            | ✓                                      |                                    |                                            |                                      |                                        |                                       | ✓                                          | ✓ |
| 36    | <i>Streptococcus thermophilus</i> ACA-DC 7                            | Yogurt                   |                                               |                                                                           |                                               |                                              |                                        |                                    |                                            |                                      |                                        | ✓                                     | ✓                                          |   |
| 37    | <i>Streptococcus thermophilus</i> ACA-DC 10                           | Dairy industrial mixture |                                               |                                                                           |                                               |                                              |                                        |                                    |                                            |                                      |                                        | ✓                                     | ✓                                          |   |
| 38    | <i>Streptococcus thermophilus</i> ACA-DC 26                           | Yogurt                   |                                               |                                                                           |                                               |                                              |                                        | ✓                                  |                                            |                                      |                                        |                                       | ✓                                          |   |
| 39    | <i>Streptococcus thermophilus</i> ACA-DC 40                           | Xynotyri cheese          |                                               |                                                                           |                                               |                                              |                                        |                                    |                                            | ✓                                    | ✓                                      | ✓                                     |                                            |   |
| 40    | <i>Streptococcus thermophilus</i> ACA-DC 1691                         | Feta cheese              |                                               |                                                                           |                                               |                                              |                                        |                                    |                                            | ✓                                    | ✓                                      |                                       | ✓                                          |   |
| 41    | <i>Streptococcus thermophilus</i> ACA-DC 2048                         | Feta cheese              |                                               |                                                                           |                                               |                                              |                                        |                                    |                                            |                                      |                                        | ✓                                     | ✓                                          | ✓ |
